# Supplementary material
Source: publisher figshare collection journal article supplement (https://frontiersin.figshare.com/ndownloader/files/13849244)
Supplement: Supplementary file [file 13849244]

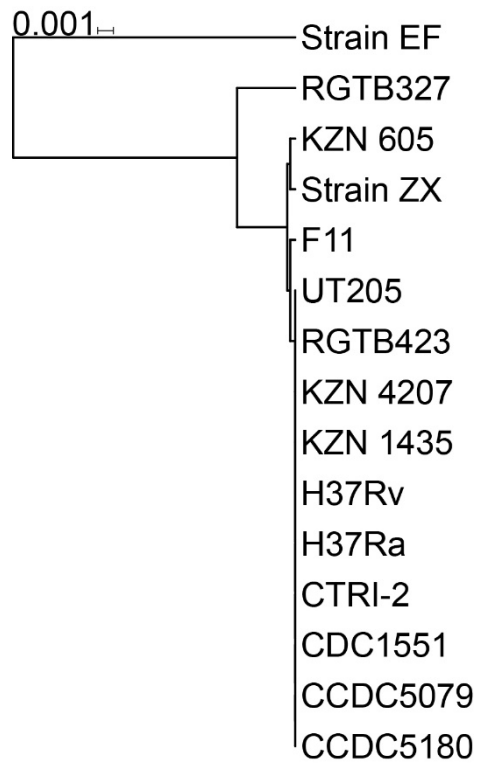

**Supplementary Figure 1** | Phylogenetic classification of *M. tuberculosis* strains using 16S rRNA gene alignments.
